# Supplementary material for: Association between Pre-Pregnancy BMI and Inflammatory Profile Trajectories during Pregnancy and Postpartum in Brazilian Women with Periodontitis: The IMPROVE Trial
Source: MDPI journal article supplement (doi:10.3390/ijerph19052705), 2022-02-25
Supplement: s1 [file s1]

**Supplemental Table S1.** Longitudinal bivariate linear regression model for CRP, IL-6 and IL-10 interleukins, and MMP-9 levels in pregnant women with periodontitis in Rio de Janeiro, Brazil.

| Variables                                               | CRP       |                |                  | IL-6      |                 |                  | IL-10     |                |                  | MMP-9     |                 |                  |
|---------------------------------------------------------|-----------|----------------|------------------|-----------|-----------------|------------------|-----------|----------------|------------------|-----------|-----------------|------------------|
|                                                         | $\beta^1$ | 95% CI         | <i>p</i> value   | $\beta^1$ | 95% CI          | <i>p</i> value   | $\beta^1$ | 95% CI         | <i>p</i> value   | $\beta^1$ | 95% CI          | <i>p</i> value   |
| Age (y)                                                 | 0.165     | -0.005/0.336   | <b>0.059</b>     | -0.045    | -0.093/0.001    | <b>0.061</b>     | -0.078    | -0.141/-0.013  | <b>0.016</b>     | 0.042     | 0.002/0.081     | <b>0.036</b>     |
| Years of education (y)                                  | -0.288    | -0.742/0.162   | 0.212            | 0.096     | -0.028/0.220    | <b>0.131</b>     | 0.010     | -0.158/0.180   | 0.902            | 0.116     | 0.010/0.220     | <b>0.029</b>     |
| Monthly per-capita income (US\$)                        | 0.0007    | -0.0015/0.003  | 0.522            | -0.0003   | -0.0009/0.0003  | 0.338            | -0.0004   | -0.0012/0.0004 | 0.368            | 0.0005    | 0.00001/0.001   | <b>0.044</b>     |
| Marital status (other/living with partner) <sup>2</sup> | 0.330     | -2.915/3.602   | 0.842            | -1.000    | -1.877/-0.135   | <b>0.024</b>     | 0.034     | -1.158/1.255   | 0.955            | 0.582     | -0.150/1.320    | <b>0.122</b>     |
| Parity (number of parturitions)                         | -0.038    | -0.908/0.8333  | 0.932            | -0.286    | -0.526/0.046    | <b>0.020</b>     | -0.388    | -0.708/-0.061  | <b>0.018</b>     | -0.132    | -0.332/0.067    | <b>0.195</b>     |
| Alcohol intake (no/yes) <sup>2</sup>                    | -0.239    | -2.960/2.479   | 0.863            | -0.530    | -1.280/0.220    | <b>0.168</b>     | -0.458    | -1.476/0.560   | 0.378            | -0.320    | -0.948/0.318    | 0.320            |
| Prepregnancy BMI (kg/m <sup>2</sup> )                   | 0.320     | 0.184/0.457    | <b>&lt;0.001</b> | 0.059     | 0.020/0.097     | <b>0.002</b>     | 0.002     | -0.051/0.061   | 0.913            | 0.001     | -0.032/0.034    | 0.952            |
| Gestational weight gain (kg)                            | -0.060    | -0.203/0.083   | 0.413            | -0.027    | -0.076/0.023    | 0.289            | 0.013     | -0.040/0.065   | 0.633            | -0.004    | -0.036/0.030    | 0.827            |
| Insulin ( $\mu$ U/mL)                                   | 0.500     | 0.268/0.739    | <b>&lt;0.001</b> | 0.034     | -0.023/0.092    | 0.247            | 0.040     | -0.048/0.132   | 0.365            | 0.096     | 0.042/0.151     | <b>&lt;0.001</b> |
| Energy intake (kcal/d)                                  | 0.0001    | -0.0003/0.0005 | 0.629            | -0.0001   | -0.0001/0.00002 | <b>0.141</b>     | -0.0001   | -0.0002/0.0001 | 0.316            | -0.00006  | -0.0001/0.00002 | <b>0.151</b>     |
| Calcium intake (mg/d) <sup>3</sup>                      | 0.001     | -0.0002/0.002  | <b>0.105</b>     | -0.0003   | -0.0007/0.00007 | <b>0.112</b>     | -0.0002   | -0.0007/0.0002 | 0.398            | -0.0001   | -0.0004/0.0002  | 0.470            |
| Inflammatory diet index                                 | -0.252    | -0.763/0.258   | 0.334            | 0.144     | 0.003/0.285     | <b>0.046</b>     | -0.015    | -0.209/0.176   | 0.872            | 0.113     | -0.005/0.230    | <b>0.060</b>     |
| Number of infections                                    | -0.127    | -0.368/0.111   | 0.299            | 0.026     | -0.039/0.0922   | 0.433            | 0.149     | 0.062/0.236    | <b>&lt;0.001</b> | -0.002    | -0.058/0.053    | 0.924            |
| Anti-inflammatory use (no/yes) <sup>2</sup>             | 1.230     | -0.895/3.363   | 0.258            | 0.025     | -0.559/0.610    | 0.931            | -0.253    | -1.046/0.553   | 0.533            | 0.498     | 0.006/0.990     | <b>0.048</b>     |
| Periodontal treatment (no/yes) <sup>2</sup>             | -1.00     | -2.980/0.978   | 0.322            | 0.958     | 0.424/1.492     | <b>&lt;0.001</b> | 0.717     | -0.023/1.451   | <b>0.057</b>     | -0.295    | -0.752/0.160    | 0.206            |
| Vit D/ milk fortification (no/yes) <sup>2</sup>         | 2.054     | 0.091/3.997    | <b>0.040</b>     | -0.134    | -0.682/0.414    | 0.632            | 0.413     | -0.343/1.150   | 0.273            | 0.192     | -0.264/0.650    | 0.410            |
| Pocket depth (mm)                                       | 6.539     | 3.932/9.127    | <b>&lt;0.001</b> | 0.538     | -0.244/1.320    | <b>0.177</b>     | 1.361     | 0.404/2.318    | <b>0.005</b>     | -0.232    | -0.773/0.306    | 0.398            |
| CAL (mm)                                                | 6.198     | 3.828/8.563    | <b>&lt;0.001</b> | 0.152     | -0.646/0.950    | 0.709            | 0.313     | -0.603/1.234   | 0.503            | -0.529    | -1.069/0.009    | <b>0.054</b>     |
| BOP (%)                                                 | 8.675     | 4.771/12.552   | <b>&lt;0.001</b> | 2.008     | 0.863/3.150     | <b>&lt;0.001</b> | 1.380     | -0.034/2.796   | <b>0.056</b>     | -0.268    | -1.063/0.526    | 0.508            |
| $\Delta$ Pocket depth (mm) <sup>4</sup>                 | -4.729    | -7.292/-2.156  | <b>&lt;0.001</b> | -0.487    | -1.318/0.342    | 0.251            | -2.793    | -3.783/-1.802  | <b>&lt;0.001</b> | 0.361     | -0.169/0.891    | <b>0.182</b>     |
| $\Delta$ CAL (mm) <sup>4</sup>                          | -1.431    | -3.573/0.710   | <b>0.191</b>     | -0.612    | -1.085/-0.138   | <b>0.011</b>     | -0.577    | -1.470/0.314   | 0.206            | 0.234     | -0.213/0.682    | 0.305            |
| $\Delta$ BOP (%) <sup>4</sup>                           | -3.166    | -6.627/0.303   | <b>0.073</b>     | -2.381    | -3.362/-1.396   | <b>&lt;0.001</b> | -2.183    | -3.413/-0.953  | <b>&lt;0.001</b> | 0.358     | -0.349/1.059    | 0.317            |

<sup>1</sup> $\beta$  is the angular coefficient. <sup>2</sup>Categorical variables for which the first category is the reference. <sup>3</sup>Calcium intake at baseline before the intervention. **Bold:** *p*-value  $\leq 0.20$ . <sup>4</sup>The difference between T2 and T0.
